# Supplementary material
Source: publisher figshare collection journal article supplement (https://karger.figshare.com/ndownloader/files/6971411)
Supplement: Supplementary file 1 [file 6971411]

**Figure S1**

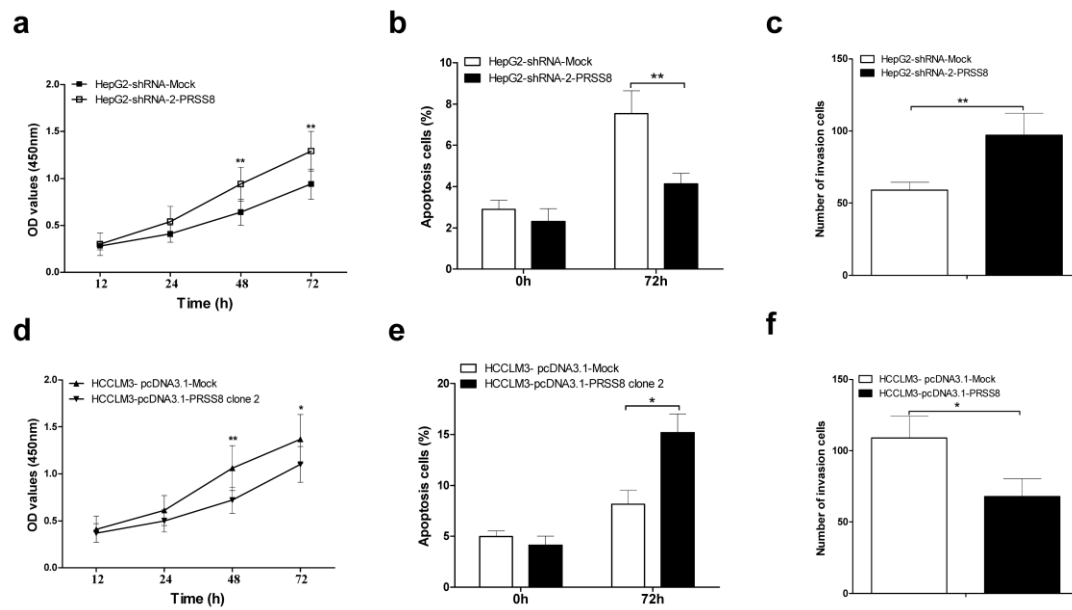

Figure S1. Silencing of PRSS8 promotes, while overexpression of PRSS8 inhibits HCC cell growth and invasion. PRSS8 was silenced in HepG2 cells using lentivirus-delivered shRNA-2. **a**. The cell viability influenced by PRSS8 was assessed by time course CCK-8 assay. **b**. The cell apoptosis influenced by PRSS8 was assessed by Annexin V/PI apoptosis detection assay. **c**. The cell invasion influenced by PRSS8 was assessed by Matrigel precoated Transwell assay. PRSS8 was overexpressed in HCCLM3 cells using the pcDNA3.1 plasmid. The cell viability (**d**), cell apoptosis (**e**) and cell invasion (**f**) were measured. Data are shown as mean  $\pm$  SD from three independent experiments. \* $P$ <0.05, \*\* $P$ <0.01.

**Figure S2**

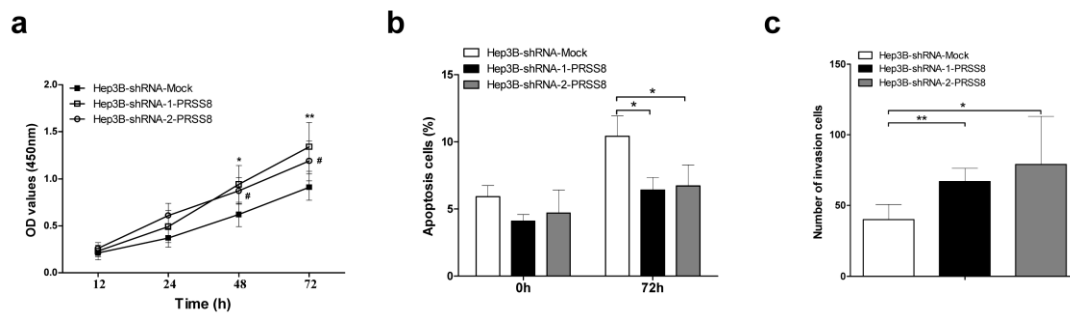

Figure S2. Silencing of PRSS8 promotes HCC cell growth and invasion in Hep3B cells. PRSS8 was silenced in Hep3B cells using two lentivirus-delivered shRNAs. The cell viability (a), cell apoptosis (b) and cell invasion (c) were measured. Data are shown as mean  $\pm$  SD from three independent experiments. \*  $P < 0.05$ , \*\*  $P < 0.01$ .

**Figure S3**

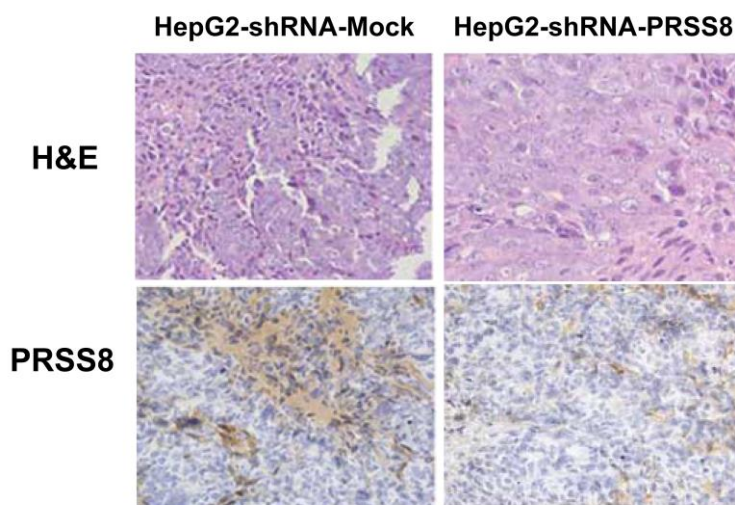

Figure S3. Staining with hematoxylin and eosin (H&E) or immunohistochemical staining for PRSS8 in HepG2-shRNA-Mock and HepG2-shRNA- PRSS8 cell derived xenografted tumors in mice at the experimental end point.
